# Supplementary material for: Amyloid-related imaging abnormalities-haemosiderin (ARIA-H) in patients with Alzheimer's disease treated with bapineuzumab: a historical, prospective secondary analysis
Source: HighWire-hosted journal article supplement (doi:10.1136/jnnp-2014-309493), 2015-02-10
Supplement: jnnp-2014-309493supp_table.pdf [file jnnp-2014-309493supp_table.pdf]

**Supplemental Table 1:** ARIA-H<10mm incidence rates per 100 person-years by baseline demographics, medical history and MR images.

|                                         |                    | Subjects<br>at risk | Subjects<br>with new<br>onset<br>ARIA-<br>H<10mm | Person-<br>Years | Rate per 100<br>person-years | 95% Confidence Interval |             |
|-----------------------------------------|--------------------|---------------------|--------------------------------------------------|------------------|------------------------------|-------------------------|-------------|
|                                         |                    |                     |                                                  |                  |                              | Lower Limit             | Upper Limit |
| Overall                                 |                    | 301                 | 30                                               | 410.59           | 7.31                         | 5.03                    | 10.29       |
| Arm                                     |                    |                     |                                                  |                  |                              |                         |             |
|                                         | Placebo            | 100                 | 3                                                | 117.71           | 2.55                         | 0.71                    | 6.80        |
|                                         | Bapineuzumab       | 201                 | 27                                               | 292.89           | 9.22                         | 6.21                    | 13.21       |
| Dose                                    |                    |                     |                                                  |                  |                              |                         |             |
|                                         | 0.0 mg/kg          | 100                 | 3                                                | 117.71           | 2.55                         | 0.71                    | 6.80        |
|                                         | 0.15mg/kg          | 42                  | 5                                                | 74.81            | 6.68                         | 2.53                    | 14.65       |
|                                         | 0.5 mg/kg          | 57                  | 9                                                | 74.37            | 12.10                        | 5.98                    | 22.09       |
|                                         | 1.0 mg/kg          | 62                  | 6                                                | 90.77            | 6.61                         | 2.75                    | 13.62       |
|                                         | 2.0 mg/kg          | 40                  | 7                                                | 52.93            | 13.23                        | 5.90                    | 25.97       |
| APOE ε4 allele frequency                |                    |                     |                                                  |                  |                              |                         |             |
|                                         | None               | 101                 | 3                                                | 155.63           | 1.93                         | 0.53                    | 5.14        |
|                                         | One (heterozygote) | 149                 | 14                                               | 196.15           | 7.14                         | 4.09                    | 11.66       |
|                                         | Two (homozygote)   | 51                  | 13                                               | 58.82            | 22.10                        | 12.38                   | 36.72       |
| ARIA-H <10mm (small ARIA-H) at baseline |                    |                     |                                                  |                  |                              |                         |             |
|                                         | None               | 273                 | 21                                               | 378.07           | 5.5                          |                         |             |
|                                         | Yes                | 28                  | 9                                                | 32.52            | 27.6                         |                         |             |
| ARIA-H <10mm, number at baseline        |                    |                     |                                                  |                  |                              |                         |             |

Legend: "Months relative to start of active therapy"

|                                             |                                      | 95% Confidence Interval |                                                  |                  |                              |             |             |
|---------------------------------------------|--------------------------------------|-------------------------|--------------------------------------------------|------------------|------------------------------|-------------|-------------|
|                                             |                                      | Subjects<br>at risk     | Subjects<br>with new<br>onset<br>ARIA-<br>H<10mm | Person-<br>Years | Rate per 100<br>person-years | Lower Limit | Upper Limit |
|                                             | 0                                    | 273                     | 21                                               | 378.07           | 5.55                         | 3.54        | 8.33        |
|                                             | 1                                    | 21                      | 5                                                | 27.28            | 18.33                        | 6.95        | 40.18       |
|                                             | 2                                    | 1                       | 0                                                | 2.87             | 0.00                         |             | 85.87       |
|                                             | 4                                    | 1                       | 0                                                | 0.11             | 0.00                         |             | 2195.01     |
|                                             | 5                                    | 1                       | 1                                                | 0.55             | 181.72                       | 16.48       | 847.18      |
|                                             | 7                                    | 2                       | 1                                                | 1.48             | 67.64                        | 6.13        | 315.34      |
|                                             | 20                                   | 1                       | 1                                                | 0.12             | 849.42                       | 77.04       | 3960.05     |
|                                             | 25                                   | 1                       | 1                                                | 0.12             | 849.42                       | 77.04       | 3960.05     |
| ARIA-H <10mm                                | 2 or more                            | 7                       | 4                                                | 5.25             | 76.25                        | 25.49       | 181.29      |
| ARIA-H ≥10mm (large ARIA-H) at baseline     |                                      |                         |                                                  |                  |                              |             |             |
|                                             | None                                 | 296                     | 29                                               | 404.67           | 7.17                         | 4.90        | 10.15       |
|                                             | Yes                                  | 5                       | 1                                                | 5.93             | 16.87                        | 1.53        | 78.65       |
| White Matter Hyperintensities (at baseline) |                                      |                         |                                                  |                  |                              |             |             |
|                                             | None or Focal                        | 264                     | 25                                               | 365.68           | 6.84                         | 4.53        | 9.93        |
|                                             | Beginning of<br>Confluent or Diffuse | 37                      | 5                                                | 44.91            | 11.13                        | 4.22        | 24.40       |
| ARIA- E                                     |                                      |                         |                                                  |                  |                              |             |             |
|                                             | No                                   | 299                     | 29                                               | 405.94           | 7.14                         | 4.88        | 10.11       |
|                                             | Yes                                  | 2                       | 1                                                | 4.65             | 21.50                        | 1.95        | 100.22      |
| Modified Hachinski Score                    |                                      |                         |                                                  |                  |                              |             |             |

|                                                           |                  | 95% Confidence Interval |                                                  |                  |                              |             |             |
|-----------------------------------------------------------|------------------|-------------------------|--------------------------------------------------|------------------|------------------------------|-------------|-------------|
|                                                           |                  | Subjects<br>at risk     | Subjects<br>with new<br>onset<br>ARIA-<br>H<10mm | Person-<br>Years | Rate per 100<br>person-years | Lower Limit | Upper Limit |
|                                                           | <= 0.5           | 162                     | 13                                               | 227.35           | 5.72                         | 3.20        | 9.50        |
|                                                           | >0.5             | 139                     | 17                                               | 183.24           | 9.28                         | 5.61        | 14.52       |
| Antithrombotic use                                        |                  |                         |                                                  |                  |                              |             |             |
|                                                           | No               | 159                     | 10                                               | 220.87           | 4.53                         | 2.32        | 8.03        |
|                                                           | Yes              | 142                     | 20                                               | 189.73           | 10.54                        | 6.64        | 15.96       |
| Hypertension*                                             |                  |                         |                                                  |                  |                              |             |             |
|                                                           | No               | 214                     | 21                                               | 291.67           | 7.20                         | 4.59        | 10.80       |
|                                                           | Yes              | 87                      | 9                                                | 118.93           | 7.57                         | 3.74        | 13.81       |
| Age in years                                              |                  |                         |                                                  |                  |                              |             |             |
|                                                           | < 72 years       | 168                     | 14                                               | 234.86           | 5.96                         | 3.41        | 9.73        |
|                                                           | 72 or more years | 133                     | 16                                               | 175.73           | 9.10                         | 5.42        | 14.43       |
| Gender                                                    |                  |                         |                                                  |                  |                              |             |             |
|                                                           | Men              | 140                     | 17                                               | 197.47           | 8.61                         | 5.21        | 13.47       |
|                                                           | Women            | 161                     | 13                                               | 213.12           | 6.10                         | 3.42        | 10.13       |
| Hamilton Psychiatric Rating Scale for<br>Depression Score |                  |                         |                                                  |                  |                              |             |             |
|                                                           | <=2.0            | 193                     | 22                                               | 271.84           | 8.09                         | 5.22        | 12.03       |
|                                                           | >2.0             | 107                     | 7                                                | 138.39           | 5.06                         | 2.26        | 9.93        |

Hypertension is defined by either the use of an antihypertensive therapy, systolic blood pressure greater than 140mm Hg or diastolic blood pressure greater than 90mm Hg.

**Supplemental Table 2** Incidence rates per 100 person-years for ARIA-H<10mm by baseline demographics, medical history and MR images. (additional information from table 2)

|                                     |       | Subjects<br>at risk,<br>n | Subjects<br>with<br>incident<br>ARIA-<br>H<10mm,<br>n | Person-<br>Years | Rate per 100<br>person-years | 95% Confidence Interval |             |
|-------------------------------------|-------|---------------------------|-------------------------------------------------------|------------------|------------------------------|-------------------------|-------------|
|                                     |       |                           |                                                       |                  |                              | Lower Limit             | Upper Limit |
| Dose mg/kg                          |       |                           |                                                       |                  |                              |                         |             |
| ARIA-H <10mm<br>present at baseline |       |                           |                                                       |                  |                              |                         |             |
| 0                                   | No    | 92                        | 1                                                     | 110.35           | 0.91                         | 0.08                    | 4.22        |
| 0                                   | Yes   | 8                         | 2                                                     | 7.35             | 27.21                        | 5.43                    | 87.21       |
| 0.15                                | No    | 38                        | 3                                                     | 68.28            | 4.39                         | 1.22                    | 11.72       |
| 0.15                                | Yes   | 4                         | 2                                                     | 6.53             | 30.62                        | 6.11                    | 98.14       |
| 0.5                                 | No    | 50                        | 8                                                     | 64.56            | 12.39                        | 5.85                    | 23.38       |
| 0.5                                 | Yes   | 7                         | 1                                                     | 9.82             | 10.19                        | 0.92                    | 47.49       |
| 1                                   | No    | 56                        | 4                                                     | 84.42            | 4.74                         | 1.58                    | 11.26       |
| 1                                   | Yes   | 6                         | 2                                                     | 6.35             | 31.49                        | 6.28                    | 100.93      |
| 2                                   | No    | 37                        | 5                                                     | 50.46            | 9.91                         | 3.76                    | 21.72       |
| 2                                   | Yes   | 3                         | 2                                                     | 2.47             | 80.99                        | 16.15                   | 259.60      |
| Dose mg/kg                          |       |                           |                                                       |                  |                              |                         |             |
| Modified Hachinski<br>Score         |       |                           |                                                       |                  |                              |                         |             |
| 0                                   | <=0.5 | 54                        | 1                                                     | 66.84            | 1.50                         | 0.14                    | 6.97        |
| 0                                   | >0.5  | 46                        | 2                                                     | 50.86            | 3.93                         | 0.78                    | 12.60       |
| 0.15                                | <=0.5 | 23                        | 1                                                     | 40.06            | 2.50                         | 0.23                    | 11.64       |
| 0.15                                | >0.5  | 19                        | 4                                                     | 34.75            | 11.51                        | 3.85                    | 27.37       |
| 0.5                                 | <=0.5 | 29                        | 5                                                     | 38.58            | 12.96                        | 4.92                    | 28.41       |

|            |       | 95% Confidence Interval             |                                                       |                  |                              |             |             |  |
|------------|-------|-------------------------------------|-------------------------------------------------------|------------------|------------------------------|-------------|-------------|--|
|            |       | Subjects<br>at risk,<br>n           | Subjects<br>with<br>incident<br>ARIA-<br>H<10mm,<br>n | Person-<br>Years | Rate per 100<br>person-years | Lower Limit | Upper Limit |  |
| 0.5        | >0.5  | 28                                  | 4                                                     | 35.79            | 11.18                        | 3.74        | 26.57       |  |
| 1          | <=0.5 | 33                                  | 2                                                     | 52.38            | 3.82                         | 0.76        | 12.24       |  |
| 1          | >0.5  | 29                                  | 4                                                     | 38.40            | 10.42                        | 3.48        | 24.77       |  |
| 2          | <=0.5 | 23                                  | 4                                                     | 29.49            | 13.56                        | 4.53        | 32.25       |  |
| 2          | >0.5  | 17                                  | 3                                                     | 23.44            | 12.80                        | 3.54        | 34.15       |  |
| Dose mg/kg |       | Antithrombotic use                  |                                                       |                  |                              |             |             |  |
| 0          | No    | 60                                  | 1                                                     | 70.80            | 1.41                         | 0.13        | 6.58        |  |
| 0          | Yes   | 40                                  | 2                                                     | 46.90            | 4.26                         | 0.85        | 13.67       |  |
| 0.15       | No    | 22                                  | 2                                                     | 40.65            | 4.92                         | 0.98        | 15.77       |  |
| 0.15       | Yes   | 20                                  | 3                                                     | 34.16            | 8.78                         | 2.43        | 23.43       |  |
| 0.5        | No    | 24                                  | 3                                                     | 32.48            | 9.24                         | 2.56        | 24.64       |  |
| 0.5        | Yes   | 33                                  | 6                                                     | 41.89            | 14.32                        | 5.95        | 29.52       |  |
| 1          | No    | 29                                  | 0                                                     | 45.44            | 0.00                         |             | 5.42        |  |
| 1          | Yes   | 33                                  | 6                                                     | 45.34            | 13.23                        | 5.50        | 27.28       |  |
| 2          | No    | 24                                  | 4                                                     | 31.50            | 12.70                        | 4.25        | 30.19       |  |
| 2          | Yes   | 16                                  | 3                                                     | 21.43            | 14.00                        | 3.87        | 37.34       |  |
| Dose mg/kg |       | Elevated Blood Pressure at Baseline |                                                       |                  |                              |             |             |  |
| 0          | No    | 69                                  | 3                                                     | 80.75            | 3.72                         | 1.03        | 9.91        |  |
| 0          | Yes   | 31                                  | 0                                                     | 36.96            | 0.00                         |             | 6.67        |  |
| 0.15       | No    | 25                                  | 1                                                     | 44.39            | 2.25                         | 0.20        | 10.50       |  |
| 0.15       | Yes   | 17                                  | 4                                                     | 30.42            | 13.15                        | 4.40        | 31.26       |  |
| 0.5        | No    | 48                                  | 8                                                     | 61.83            | 12.94                        | 6.10        | 24.41       |  |
| 0.5        | Yes   | 9                                   | 1                                                     | 12.54            | 7.97                         | 0.72        | 37.18       |  |

|            |                             | 95% Confidence Interval   |                                                       |                  |                              |             |             |  |
|------------|-----------------------------|---------------------------|-------------------------------------------------------|------------------|------------------------------|-------------|-------------|--|
|            |                             | Subjects<br>at risk,<br>n | Subjects<br>with<br>incident<br>ARIA-<br>H<10mm,<br>n | Person-<br>Years | Rate per 100<br>person-years | Lower Limit | Upper Limit |  |
| 1          | No                          | 43                        | 4                                                     | 65.86            | 6.07                         | 2.03        | 14.44       |  |
| 1          | Yes                         | 19                        | 2                                                     | 24.91            | 8.03                         | 1.60        | 25.73       |  |
| 2          | No                          | 29                        | 5                                                     | 38.83            | 12.88                        | 4.88        | 28.22       |  |
| 2          | Yes                         | 11                        | 2                                                     | 14.10            | 14.19                        | 2.83        | 45.48       |  |
|            | ApoE ε4 allele<br>frequency |                           |                                                       |                  |                              |             |             |  |
| Dose mg/kg | 0                           | 29                        | 0                                                     | 34.04            | 0.00                         |             | 7.24        |  |
|            | 1                           | 52                        | 1                                                     | 61.84            | 1.62                         | 0.15        | 7.54        |  |
|            | 2                           | 19                        | 2                                                     | 21.83            | 9.16                         | 1.83        | 29.37       |  |
| 0.15       | 0                           | 16                        | 1                                                     | 26.77            | 3.74                         | 0.34        | 17.42       |  |
| 0.15       | 1                           | 19                        | 0                                                     | 39.98            | 0.00                         |             | 6.16        |  |
| 0.15       | 2                           | 7                         | 4                                                     | 8.06             | 49.61                        | 16.59       | 117.95      |  |
| 0.5        | 0                           | 22                        | 2                                                     | 33.91            | 5.90                         | 1.18        | 18.90       |  |
| 0.5        | 1                           | 29                        | 4                                                     | 33.94            | 11.79                        | 3.94        | 28.02       |  |
| 0.5        | 2                           | 6                         | 3                                                     | 6.53             | 45.96                        | 12.72       | 122.62      |  |
| 1          | 0                           | 15                        | 0                                                     | 30.61            | 0.00                         |             | 8.05        |  |
| 1          | 1                           | 36                        | 5                                                     | 46.95            | 10.65                        | 4.04        | 23.34       |  |
| 1          | 2                           | 11                        | 1                                                     | 13.21            | 7.57                         | 0.69        | 35.30       |  |
| 2          | 0                           | 19                        | 0                                                     | 30.29            | 0.00                         |             | 8.13        |  |
| 2          | 1                           | 13                        | 4                                                     | 13.44            | 29.77                        | 9.95        | 70.77       |  |
| 2          | 2                           | 8                         | 3                                                     | 9.20             | 32.62                        | 9.03        | 87.03       |  |
| Arm        | ApoE ε4 allele<br>frequency |                           |                                                       |                  |                              |             |             |  |

|         |                             | 95% Confidence Interval   |                                                       |                  |                              |             |             |  |
|---------|-----------------------------|---------------------------|-------------------------------------------------------|------------------|------------------------------|-------------|-------------|--|
|         |                             | Subjects<br>at risk,<br>n | Subjects<br>with<br>incident<br>ARIA-<br>H<10mm,<br>n | Person-<br>Years | Rate per 100<br>person-years | Lower Limit | Upper Limit |  |
| Placebo | 0                           | 29                        | 0                                                     | 34.04            | 0.00                         |             | 7.24        |  |
| Placebo | 1                           | 52                        | 1                                                     | 61.84            | 1.62                         | 0.15        | 7.54        |  |
| Placebo | 2                           | 19                        | 2                                                     | 21.83            | 9.16                         | 1.83        | 29.37       |  |
| Arm     | ApoE ε4 allele<br>frequency |                           |                                                       |                  |                              |             |             |  |
| Active  | 0                           | 72                        | 3                                                     | 121.59           | 2.47                         | 0.68        | 6.58        |  |
| Active  | 1                           | 97                        | 13                                                    | 134.31           | 9.68                         | 5.42        | 16.08       |  |
| Active  | 2                           | 32                        | 11                                                    | 36.99            | 29.73                        | 15.78       | 51.47       |  |
